# Supplementary material for: Chemical weathering rates and controlling mechanisms of glacial catchments within different climate regimes in the Tibetan Plateau
Source: PeerJ. 2023 Jul 5;11:e15594. doi: 10.7717/peerj.15594 (PMC10329425; doi:10.7717/peerj.15594)
Supplement: Supplemental Information 2 [file peerj-11-15594-s002.xlsx]

## Sheet: Sheet 1
The principal component analysis output
Correlation Matrix
		Relief amplitude	Elevation	Annual mean temperature (AMT)	Runoff	Vegetation coverage	Carbonate-silicate rocks
Correlation	Relief amplitude	1	0.163476	-0.010045	0.116498	-0.296048	-0.157036
	Elevation	0.163476	1	-0.863308	-0.574154	0.00563912	0.261051
	Annual mean temperature (AMT)	-0.010045	-0.863308	1	0.764754	-0.141066	-0.201532
	Runoff	0.116498	-0.574154	0.764754	1	-0.392097	-0.28637
	Vegetation coverage	-0.296048	0.00563912	-0.141066	-0.392097	1	0.284113
	Carbonate-silicate rocks	-0.157036	0.261051	-0.201532	-0.28637	0.284113	1
Sig. (1-tailed)	Relief amplitude		0.170379	0.476817	0.24932	0.0397892	0.180186
	Elevation	0.170379		6.22644e-12	0.000125358	0.48698	0.0620451
	Annual mean temperature (AMT)	0.476817	6.22644e-12		2.8168e-08	0.205926	0.119267
	Runoff	0.24932	0.000125358	2.8168e-08		0.0090116	0.0452039
	Vegetation coverage	0.0397892	0.48698	0.205926	0.0090116		0.0465444
	Carbonate-silicate rocks	0.180186	0.0620451	0.119267	0.0452039	0.0465444
KMO and Bartlett's Test
Kaiser-Meyer-Olkin Measure of Sampling Adequacy.		0.585158
Bartlett's Test of Sphericity	Approx. Chi-Square	95.6867
	df	15
	Sig.	8.52018e-14
Communalities
	Initial	Extraction
Relief amplitude	1	0.692754
Elevation	1	0.874941
Annual mean temperature (AMT)	1	0.941983
Runoff	1	0.816733
Vegetation coverage	1	0.647289
Carbonate-silicate rocks	1	0.967107
Extraction Method: Principal Component Analysis.
Total Variance Explained
Component	Initial Eigenvalues			Extraction Sums of Squared Loadings
	Total	% of Variance	Cumulative %	Total	% of Variance	Cumulative %
1	2.67806	44.6343	44.6343	2.67806	44.6343	44.6343
2	1.46569	24.4282	69.0625	1.46569	24.4282	69.0625
3	0.797056	13.2843	82.3468	0.797056	13.2843	82.3468
4	0.682365	11.3728	93.7195
5	0.296032	4.93387	98.6534
6	0.0807959	1.3466	100
Extraction Method: Principal Component Analysis.
Component Matrixa
	Component
	1	2	3
Annual mean temperature (AMT)	0.917762	0.260588	0.178296
Runoff	0.877876	-0.0852032	0.196993
Elevation	-0.837536	-0.414119	0.0444996
Relief amplitude	0.0838249	-0.753163	0.3442
Vegetation coverage	-0.378135	0.705756	-0.0788143
Carbonate-silicate rocks	-0.462196	0.39203	0.774464
Extraction Method: Principal Component Analysis.
a. 3 components extracted.

## Sheet: Sheet 2
The multiple regression analysis output of TDScarb and three principal components
Model Summaryb
Model	R	R Square	Adjusted R Square	Std. Error of the Estimate	Durbin-Watson
1	.595a	0.353745	0.293159	4.94146	2.22735
a. Predictors: (Constant), Component 3, Component 2, Component 1
b. Dependent Variable: TDScarb
ANOVAa
Model		Sum of Squares	df	Mean Square	F	Sig.
1	Regression	427.708	3	142.569	5.8387	.003b
	Residual	781.376	32	24.418
	Total	1209.08	35
a. Dependent Variable: TDScarb
b. Predictors: (Constant), Component 1, Component 2, Component 3
Coefficientsa
Model		Unstandardized Coefficients		Standardized Coefficients	t	Sig.	Collinearity Statistics
		B	Std. Error	Beta			Tolerance	VIF
1	(Constant)	11.6022	0.823576		14.0876	2.86565e-15
	Component 1	1.53125	0.5104	0.426346	3.0001	0.0051934	1	1
	Component 2	-1.33735	0.689921	-0.275468	-1.9384	0.0614382	1	1
	Component 3	2.04076	0.935571	0.309986	2.1813	0.0366211	1	1
a. Dependent Variable: TDScarb

## Sheet: Sheet 3
The multiple regression analysis output of TDSsil and three principal components
Model Summaryb
Model	R	R Square	Adjusted R Square	Std. Error of the Estimate	Durbin-Watson
1	.314a	0.0983001	0.0137657	0.985149	1.55629
a. Predictors: (Constant), Component 3, Component 2, Component 1
b. Dependent Variable: TDSsil
ANOVAa
Model		Sum of Squares	df	Mean Square	F	Sig.
1	Regression	3.38568	3	1.12856	1.16284	.339b
	Residual	31.0566	32	0.970519
	Total	34.4423	35
a. Dependent Variable: TDSsil
b. Predictors: (Constant), Component 3, Component 2, Component 1
Coefficientsa
Model		Unstandardized Coefficients		Standardized Coefficients	t	Sig.	Collinearity Statistics
		B	Std. Error	Beta			Tolerance	VIF
1	(Constant)	1.6324	0.164192		9.94205	2.61303e-11
	Component 1	0.186658	0.101755	0.307925	1.83438	0.0759105	1	1
	Component 2	-0.0285106	0.137546	-0.0347949	-0.207281	0.837104	1	1
	Component 3	0.0529545	0.186519	0.0476579	0.283909	0.778309	1	1
a. Dependent Variable: TDSsil
